# Supplementary material for: Cloning and Functional Analysis of Lignin Biosynthesis Genes Cf4CL and CfCCoAOMT in Cryptomeria fortunei
Source: MDPI journal article supplement (doi:10.3390/genes10080619), 2019-08-15
Supplement: s1 [file s1]

## Supplementary Materials

**Table S1.** Analysis of secondary structure of encoded protein.

| Gene      | Alpha helix | Random coil | Extended strand | Beta turn |
|-----------|-------------|-------------|-----------------|-----------|
| Cf4CL     | 30.87       | 35.56       | 24.37           | 9.21      |
| CfCCoAOMT | 37.35       | 32.53       | 20.88           | 9.24      |

**Table S2.** Comparison of plant height and stem diameter after Tobacco Maturity.

| Plant            | WT    | 4CL   | CCoAOMT |
|------------------|-------|-------|---------|
| Plant height/cm  | 37.17 | 39.36 | 40.5    |
|                  | 5     | 7     |         |
| SD               | 6.214 | 3.659 | 5.188   |
|                  | Sig   | 0.556 | 0.442   |
| Stem diameter/mm | 4.92  | 5.68  | 6.35    |
|                  | SD    | 0.717 | 0.465   |
| Sig              |       | <0.05 | <0.01   |

For every tobacco genotype 3 plants were measured (n=3). SD, standard deviation from selected lines. Sig, the level of significance, data were compared through T-TEST.

**Table S3.** Transverse section cell wall thickness of tobacco stem segments.

| Plant                        | WT       |          | 4CL      |          | CCoAOMT  |          |          |
|------------------------------|----------|----------|----------|----------|----------|----------|----------|
|                              | (n = 30) | (n = 32) | (n = 30) | (n = 30) | (n = 32) | (n = 32) | (n = 31) |
| Cell wall thickness/ $\mu$ m | 1.365    | 2.458    | 2.464    | 2.488    | 2.565    | 2.501    | 2.472    |
| SD                           | 0.225    | 0.295    | 0.260    | 0.298    | 0.287    | 0.264    | 0.244    |
| Sig                          |          | <0.01    | <0.01    | <0.01    | <0.01    | <0.01    | <0.01    |

For every tobacco genotype 3 plants were measured (n = 3). SD, standard deviation from selected lines. Sig, the level of significance, data were compared through T-TEST

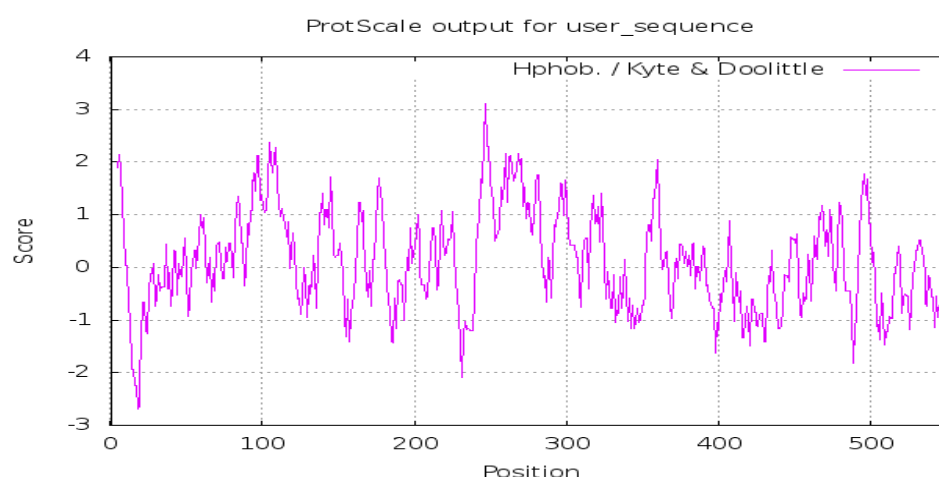

(a)

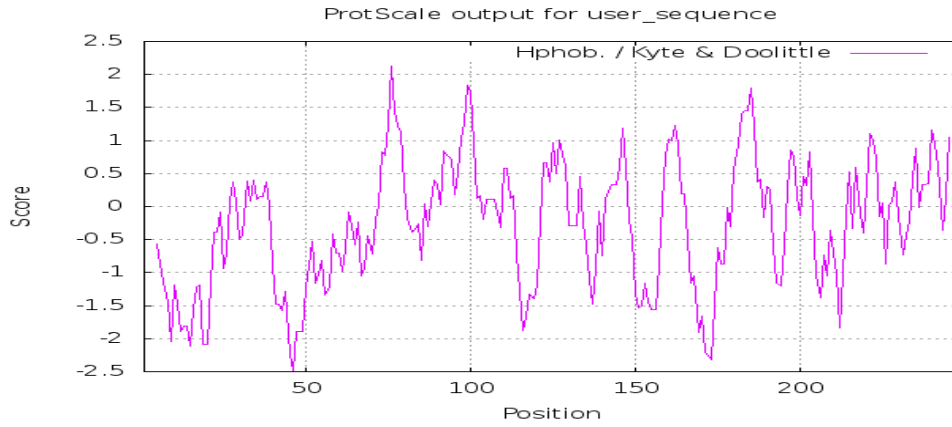

(b)

**Figure S1.** Hydrophobicity curves of the *Cf4CL* and *CfCCoAOMT* gene encoding protein of *C. fortunei*. (a) *Cf4CL* (b) *CfCCoAOMT*.

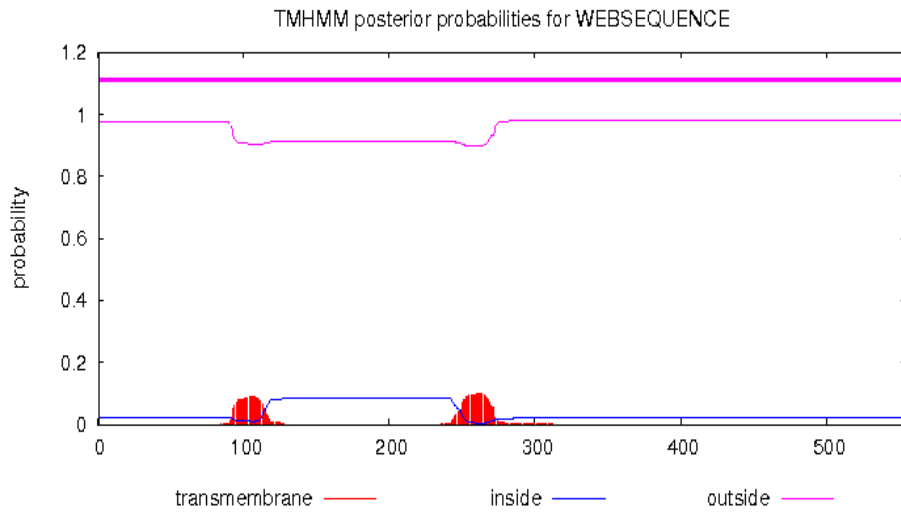

(a)

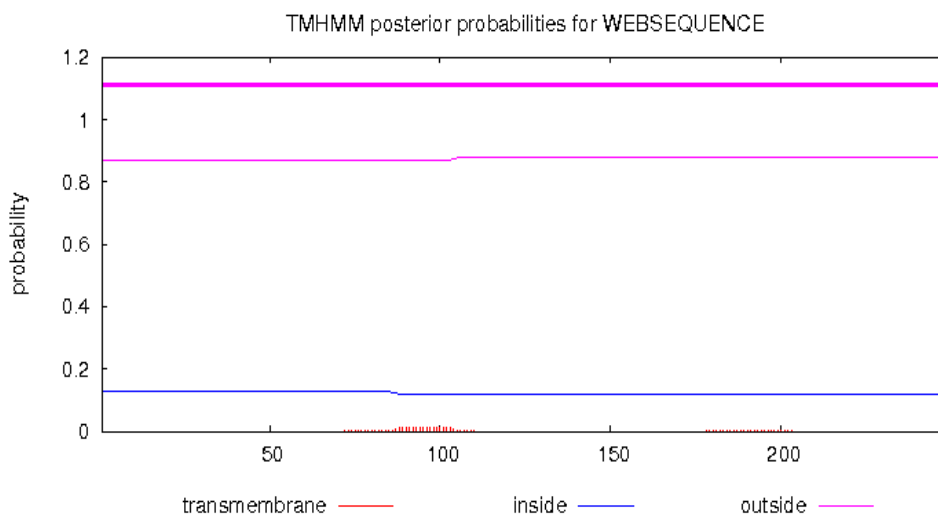

(b)

**Figure 2.** Transmembrane pattern map of *Cf4CLC* and *fCCoAOMT* gene encoding protein of *C. fortunei*. (a) *Cf4CL*, (b) *CfCCoAOMT*.

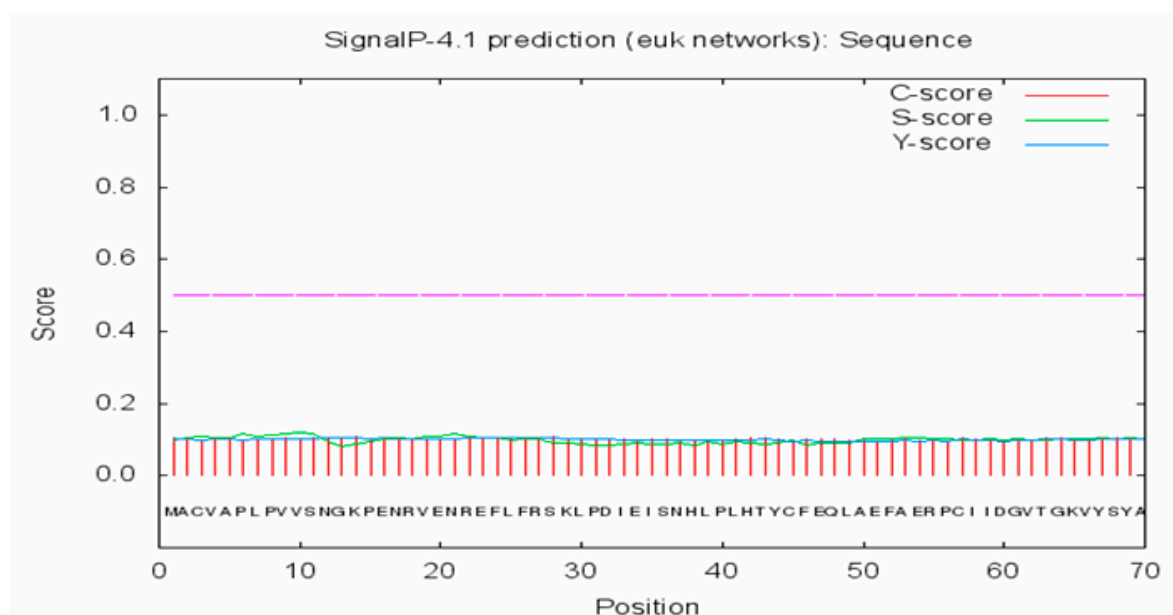

(a)

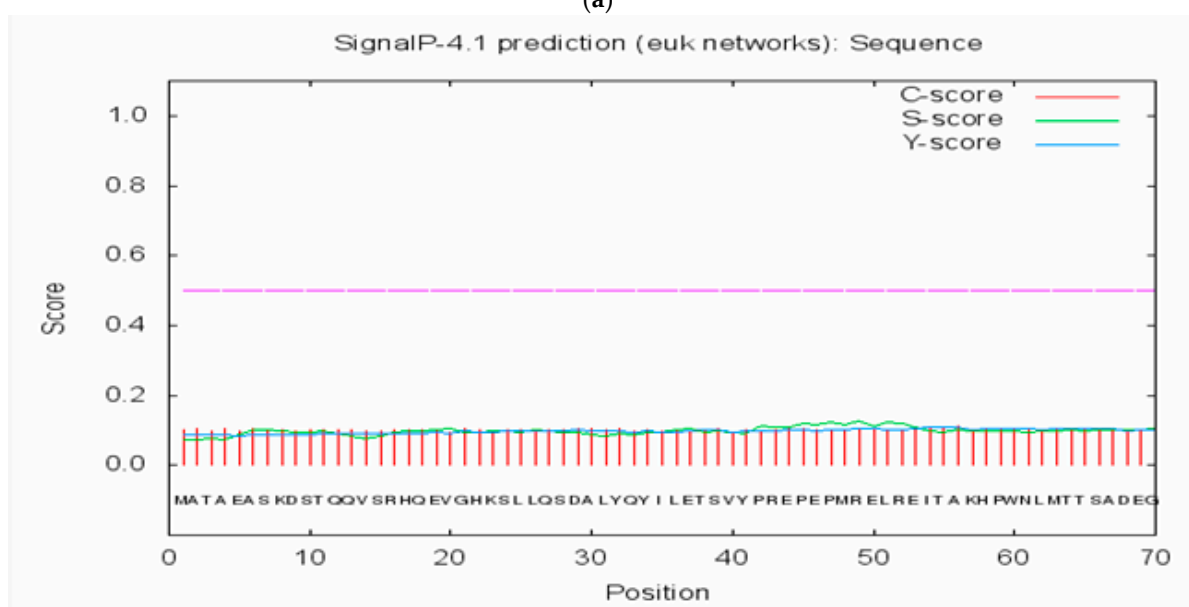

(b)

**Figure S3.** Pattern diagram of protein signal peptide encoded by *C. fortunei* *CfACL* and *CfCCoAOMT* gene. (a) *CfACL*, (b) *CfCCoAOMT*.
